# Supplementary material for: Integrated Systems Pharmacology, Urinary Metabonomics, and Quantitative Real-Time PCR Analysis to Uncover Targets and Metabolic Pathways of the You-Gui Pill in Treating Kidney-Yang Deficiency Syndrome
Source: MDPI journal article supplement (doi:10.3390/ijms20153655), 2019-07-26
Supplement: s1 [file s1]

**Figure S1.** The variation of weights of the rats among the three groups

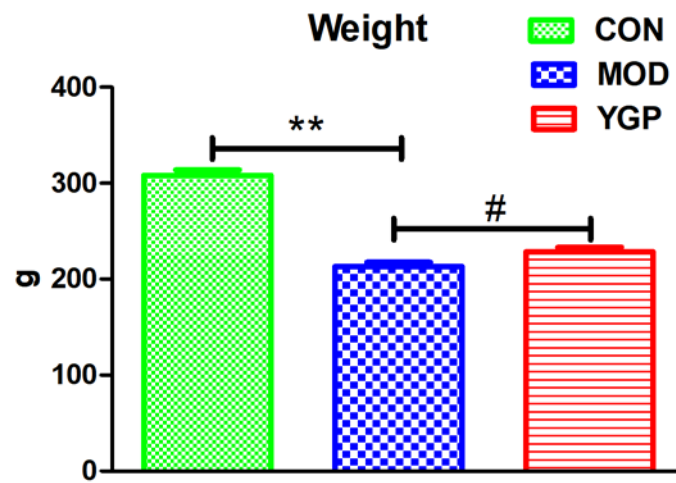

Note: \*  $P < 0.05$ , \*\*  $P < 0.01$ ; #  $P < 0.05$ , ##  $P < 0.01$

**Figure S2.** Permutation test plots (200 permutations) from urine samples: (A) CON group vs MOD group; (B) MOD group vs YGP group

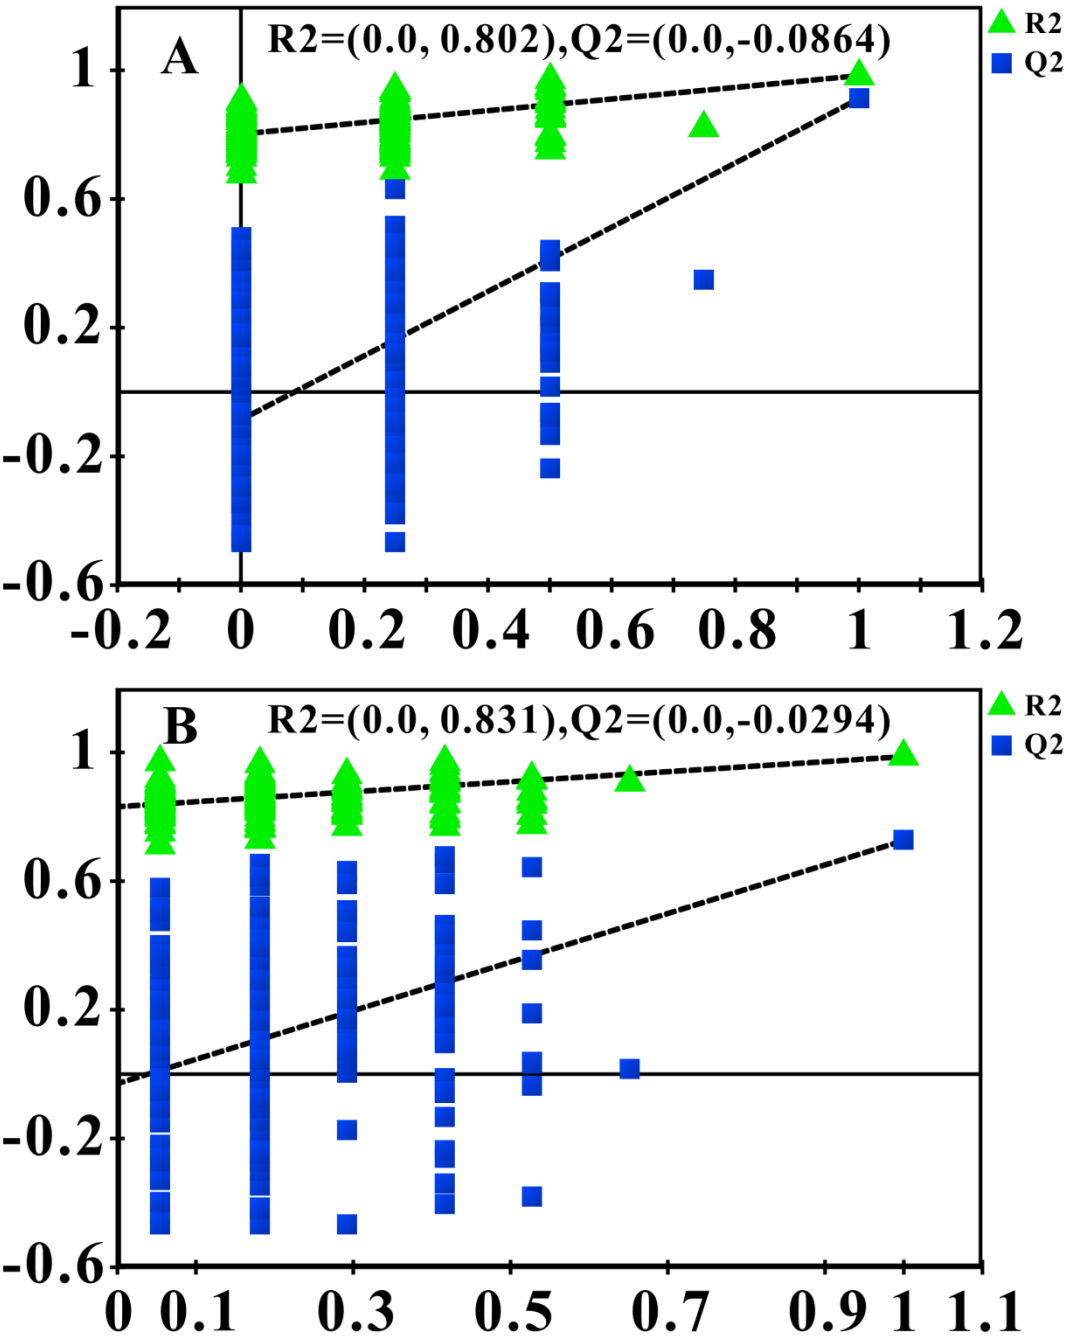

**Figure S3.** The 2D structure diagram of ten active compounds in YGP

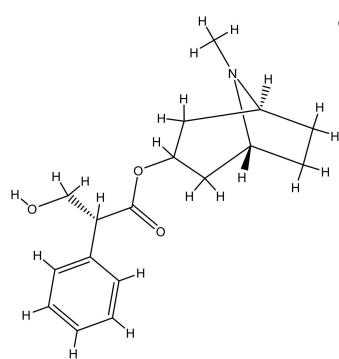

**Atropine**

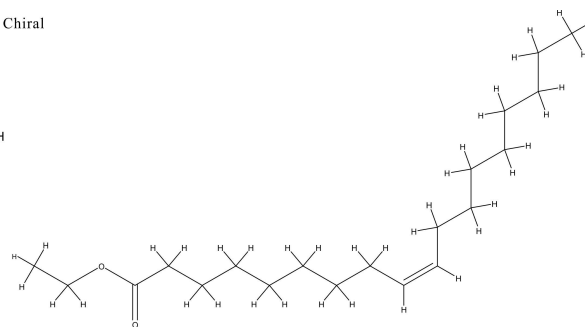

**Ethyl oleate (NF)**

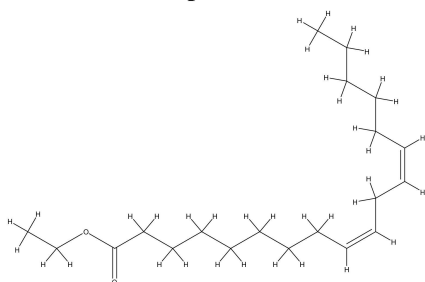

**Mandenol**

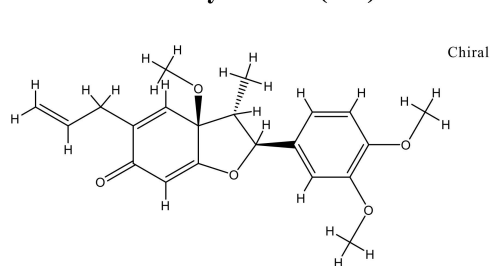

**Kadsurenone**

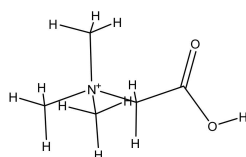

**Betaine**

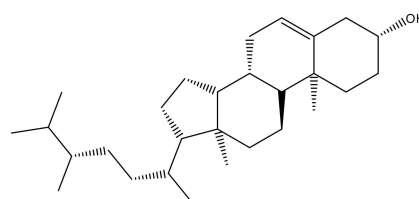

**24-Methylcholest-5-enyl-3beta-O-glucopyranoside\_qt**

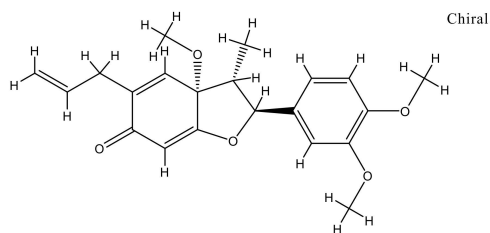

**Denudatin B**

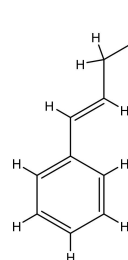

**Styrene**

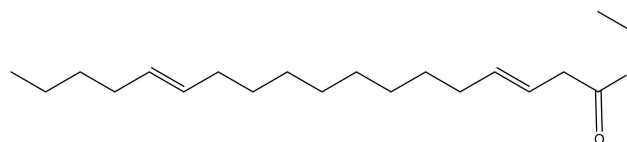

**(E,E)-1-ethyl octadeca-3,13-dienoate**

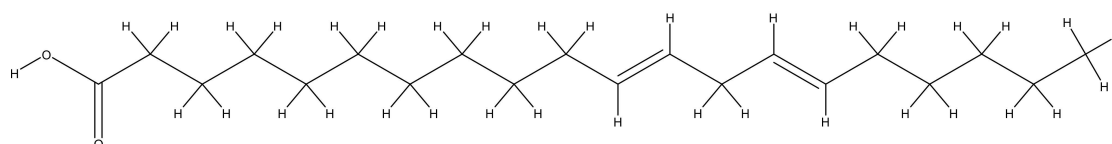

**11,14-eicosadienoic acid**
