# Supplementary material for: Integrated Systems Pharmacology, Urinary Metabonomics, and Quantitative Real-Time PCR Analysis to Uncover Targets and Metabolic Pathways of the You-Gui Pill in Treating Kidney-Yang Deficiency Syndrome
Source: MDPI journal article supplement (doi:10.3390/ijms20153655), 2019-07-26
Supplement: s1 [file s1]

## Supplementary Material

**Table S1.** Statistical analysis results of the main metabolite in urine

| No. | Metabolites            | Chemical shift (ppm)                       | VIP values in MOD vs CON                         | VIP values in YGP vs MOD                         |
|-----|------------------------|--------------------------------------------|--------------------------------------------------|--------------------------------------------------|
| 1   | 2-hydroxy isovalerate  | 0.82d, 0.95d                               | ↓**(1.19893)                                     | ↑##(1.4592)                                      |
| 2   | 2-oxoisocaproate       | 0.93d                                      | ↓**(1.20244)                                     | ↑##(1.3372)                                      |
| 3   | valine                 | 0.98d, 1.03d, 2.29(m), 3.62(d)             | ↓*(2.3414)                                       | ↑##(1.16657, 1.9085)                             |
| 4   | 3-hydroxybutyrate      | 1.20d                                      | ↓(1.27208)                                       | ↑#(1.80074)                                      |
| 5   | lactate                | 1.33d, 4.11q                               | ↓**(1.43589, 1.82228)                            | ↑##(3.22914, 2.00244)                            |
| 6   | alanine                | 1.48d                                      | ↓**(1.45455)                                     | ↑##(1.58037)                                     |
| 7   | acetate                | 1.91s                                      | ↓(3.21613)                                       | ↑#(6.38963)                                      |
| 8   | NAG                    | 2.04s                                      | ↓**(4.8771)                                      | ↑##(3.44076)                                     |
| 9   | acetone                | 2.23s                                      | ↓(1.49277)                                       | ↑##(1.5611)                                      |
| 10  | succinate              | 2.41s                                      | ↓**(2.44932)                                     | ↑##(3.71412)                                     |
| 11  | α-ketoglutarate (α-KG) | 2.45t, 3.01t                               | ↓(2.50328, 1.3932)                               | ↑##(3.03184, 3.66234)                            |
| 12  | citrate                | 2.56d, 2.72d                               | ↓**(3.93786, 2.30092)                            | ↑(1.63101, 2.51258)                              |
| 13  | dimethylamine (DMA)    | 2.71s                                      | ↓*(1.06588)                                      | ↑#(1.91873)                                      |
| 14  | dimethylglycine (DMG)  | 2.92s                                      | ↓*(3.86941)                                      | ↑(1.81422)                                       |
| 15  | creatinine             | 3.05s, 4.06s                               | ↓*(5.46773, 4.18704)                             | ↑(2.08887, 1.68475)                              |
| 16  | TMAO                   | 3.27s                                      | ↓**(4.25915)                                     | ↑(2.70055)                                       |
| 17  | choline                | 3.20s                                      | ↓*(1.74248)                                      | ↑#(1.56094)                                      |
| 18  | glycine                | 3.56s                                      | ↓(1.79166)                                       | ↑#(2.09787)                                      |
| 19  | glycerol               | 3.64dd, 3.87dd                             | ↓**(2.66159, 2.17052)                            | ↑##(1.84109, 1.70949)                            |
| 20  | creatine               | 3.93s                                      | ↓**(2.04625)                                     | ↑##(1.63151)                                     |
| 21  | α-glucose              | 5.24d, 3.70t, 3.40t, 3.83dd, 3.72dd, 3.85m | ↓**(2.12986, 1.14185, 2.47749, 2.51527, 2.43068) | ↑##(2.02001, 1.01783, 1.80521, 2.18719, 1.61842) |

|    |               |                                                        |                         |                       |
|----|---------------|--------------------------------------------------------|-------------------------|-----------------------|
| 22 | β-glucose     | 4.65d, 3.24dd, 3.47dd                                  | ↓**(1.18783, 1.60082, ) | ↑#(1.04652)           |
| 23 | betaine       | 3.90s                                                  | ↓**(3.31971)            | ↑##(2.16067)          |
| 24 | hippurate     | 3.97d, 7.55t, 7.64t, 7.84d                             | ↓**(1.43334, 1.80337)   | ↑(1.12264, 1.7032)    |
| 25 | tryptophan    | 7.21t, 7.29t, 7.56d                                    | ↓**(1.11104, 1.94659)   | ↑##(1.83171)          |
| 26 | phenylalanine | 7.33m, 7.44m, 7.39(m), 3.17(dd), 3.30(dd),<br>3.99(dd) | ↓*(1.16678, 1.78083)    | ↑##(1.24986, 1.45088) |
| 27 | formate       | 8.46s                                                  | ↓(1.45119)              | ↑#(2.57806)           |

Note: *P* value was measured by one-way ANOVA with a Bonferroni correction, \* *P* < 0.05, \*\* *P* < 0.01; # *P* < 0.05, ## *P* < 0.01. The chemical shift values of marked green corresponded to the VIP values in MOD vs CON group, while the chemical shift values of labeled red corresponded to the VIP values in YGP vs MOD group.

**Table S2.** Results of pathway analysis using MetaboAnalyst

| No. | Pathway Name                                        | Match Status | Raw p     | -log(p) | Holm p   | FDR      | Impact  | Details |
|-----|-----------------------------------------------------|--------------|-----------|---------|----------|----------|---------|---------|
| 1   | Glycine, serine and threonine metabolism            | 5/32         | 1.40E-04  | 8.8722  | 0.011359 | 0.011359 | 0.3236  | KEGG    |
| 2   | Butanoate metabolism                                | 3/20         | 0.0041543 | 5.4836  | 0.33235  | 0.090967 | 0       | KEGG    |
| 3   | Citrate cycle (TCA cycle)                           | 3/20         | 0.0041543 | 5.4836  | 0.33235  | 0.090967 | 0.14721 | KEGG    |
| 4   | Aminoacyl-tRNA biosynthesis                         | 5/67         | 0.0044922 | 5.4054  | 0.35039  | 0.090967 | 0       | KEGG    |
| 5   | Alanine, aspartate and glutamate metabolism         | 3/24         | 0.0070505 | 4.9547  | 0.54289  | 0.11422  | 0.06329 | KEGG    |
| 6   | Methane metabolism                                  | 2/9          | 0.0093998 | 4.6671  | 0.71438  | 0.1269   | 0       | KEGG    |
| 7   | Valine, leucine and isoleucine biosynthesis         | 2/11         | 0.014063  | 4.2642  | 1        | 0.16273  | 0.33333 | KEGG    |
| 8   | Glyoxylate and dicarboxylate metabolism             | 2/16         | 0.029123  | 3.5362  | 1        | 0.29487  | 0.40741 | KEGG    |
| 9   | Pyruvate metabolism                                 | 2/22         | 0.052676  | 2.9436  | 1        | 0.47408  | 0.05583 | KEGG    |
| 10  | Phenylalanine, tyrosine and tryptophan biosynthesis | 1/4          | 0.066805  | 2.706   | 1        | 0.4792   | 0.5     | KEGG    |
| 11  | Glycolysis or Gluconeogenesis                       | 2/26         | 0.071108  | 2.6435  | 1        | 0.4792   | 0.02862 | KEGG    |
| 12  | Galactose metabolism                                | 2/26         | 0.071108  | 2.6435  | 1        | 0.4792   | 0.03644 | KEGG    |
| 13  | Synthesis and degradation of ketone bodies          | 1/5          | 0.082826  | 2.491   | 1        | 0.4792   | 0       | KEGG    |
| 14  | D-Glutamine and D-glutamate metabolism              | 1/5          | 0.082826  | 2.491   | 1        | 0.4792   | 0       | KEGG    |
| 15  | Cyanoamino acid metabolism                          | 1/6          | 0.098582  | 2.3169  | 1        | 0.53234  | 0       | KEGG    |
| 16  | Valine, leucine and isoleucine degradation          | 2/38         | 0.136     | 1.9951  | 1        | 0.6494   | 0.0119  | KEGG    |
| 17  | Nitrogen metabolism                                 | 1/9          | 0.14431   | 1.9358  | 1        | 0.6494   | 0       | KEGG    |
| 18  | Phenylalanine metabolism                            | 1/9          | 0.14431   | 1.9358  | 1        | 0.6494   | 0.40741 | KEGG    |
| 19  | Selenoamino acid metabolism                         | 1/15         | 0.22919   | 1.4732  | 1        | 0.92822  | 0       | KEGG    |
| 20  | Pantothenate and CoA biosynthesis                   | 1/15         | 0.22919   | 1.4732  | 1        | 0.92822  | 0       | KEGG    |

|    |                                      |      |         |         |   |   |         |      |
|----|--------------------------------------|------|---------|---------|---|---|---------|------|
| 21 | Glycerolipid metabolism              | 1/18 | 0.26854 | 1.3147  | 1 | 1 | 0.28098 | KEGG |
| 22 | Propanoate metabolism                | 1/20 | 0.2937  | 1.2252  | 1 | 1 | 0       | KEGG |
| 23 | Starch and sucrose metabolism        | 1/23 | 0.32989 | 1.109   | 1 | 1 | 0.03778 | KEGG |
| 24 | Glutathione metabolism               | 1/26 | 0.36429 | 1.0098  | 1 | 1 | 0.00573 | KEGG |
| 25 | Porphyrin and chlorophyll metabolism | 1/27 | 0.37538 | 0.97981 | 1 | 1 | 0       | KEGG |
| 26 | Glycerophospholipid metabolism       | 1/30 | 0.40754 | 0.8976  | 1 | 1 | 0.02315 | KEGG |
| 27 | Tryptophan metabolism                | 1/41 | 0.51243 | 0.66859 | 1 | 1 | 0.15684 | KEGG |
| 28 | Arginine and proline metabolism      | 1/44 | 0.53779 | 0.62029 | 1 | 1 | 0.01198 | KEGG |
| 29 | Primary bile acid biosynthesis       | 1/46 | 0.55399 | 0.59061 | 1 | 1 | 0.02976 | KEGG |

---

Note: The “Match Status” represents the ratio of actual matched number from the user uploaded data to the number of compounds in the pathway; the *p* values from the pathway enrichment analysis and pathway impact values (from 0 to 1) from the pathway topology analysis.
